# Supplementary material
Source: PubMed Central journal article supplement (PMC7686863)
Supplement: jama-e2021566-s001.pdf [file jama-e2021566-s001.pdf]

## Supplemental Online Content

Atkins JL, Pilling LC, Masoli JAH, et al. Association of hemochromatosis *HFE* p.C282Y homozygosity with hepatic malignancy. *JAMA*. doi:10.1001/jama.2020.21566

**eMethods**

**eTables**

**eFigures**

This supplemental material has been provided by the authors to give readers additional information about their work.

1 Association of hemochromatosis HFE p.C282Y homozygosity with hepatic malignancy

2 Atkins et al, JAMA 2020

3  
4 **Supplementary Information**

5  
6 Supplementary Methods ..... 2  
7 **Genotyping of HFE p.C282Y and p.H63D**..... 2  
8 Supplementary Tables..... 3  
9 **Supplementary Table 1.** Baseline characteristics of sample by those included and those not included in the  
10 primary care follow-up sample ..... 3  
11 **Supplementary Table 2.** Baseline characteristics of sample by all study genotypes and sex..... 4  
12 **Supplementary Table 3.** Incident disease and death during follow-up for the entire cohort and primary care subset,  
13 by all study genotypes and sex<sup>a</sup>..... 6  
14 **Supplementary Table 4.** Hazards ratios (95% CI) for incident liver outcomes by C282Y-H63D genotype and sex,  
15 adjusted for age, assessment center, genotyping array and PCs 1-10 ..... 8  
16 **Supplementary Table 5.** Hazards ratios (95% CI) for incident liver outcomes by C282Y-H63D genotype and sex,  
17 adjusted for age, assessment center, genotyping array and PCs 1-10 (in subset with primary care follow-up) 13  
18 **Supplementary Table 6.** Lifetable estimates for incident liver disease (any, non-cancer) by sex and HFE genotypes  
19 (no variants vs C282Y homozygotes)..... 15  
20 **Supplementary Table 7.** Hazards ratios (95% CI) for mortality by C282Y-H63D genotype and sex, adjusted for  
21 age, assessment center, genotyping array and PCs 1-10 ..... 16  
22 **Supplementary Table 8.** Hazards ratios (95% CI) for incident liver outcomes by C282Y-H63D genotype and sex,  
23 adjusted for age, assessment center, genotyping array and PCs 1-10 (excluding prevalent haemochromatosis) 17  
24 Supplement Figures ..... 21  
25 **Supplementary Figure 1.** Kaplan-Meier failure curve in females for incidence of diagnosed liver cancer by age in  
26 HFE p.C282Y homozygotes compared to those with no variants, in subset with primary care follow-up 21  
27 **Supplementary Figure 2.** Kaplan-Meier failure curves in a) males and b) females for incidence of diagnosed liver  
28 cancer by age in HFE p.C282Y homozygotes compared to those with no HFE variants ..... 22  
29 **Supplementary Figure 3.** Kaplan-Meier failure curves in a) males and b) females for incidence of diagnosed liver  
30 disease by age in HFE p.C282Y homozygotes compared to those with no variants, in subset with primary care  
31 follow-up..... 23  
32 **Supplementary Figure 4.** Kaplan-Meier failure curves in a) males and b) females for incidence of diagnosed (non-  
33 cancer) liver disease by age in HFE p.C282Y homozygotes compared to those with no variants ... 24  
34

## Supplementary Methods

### Genotyping of *HFE* p.C282Y and p.H63D

Genotyping was performed using two near-identical (>95%) Affymetrix microarrays: 49,950 participants involved in the UK Biobank Lung Exome Variant Evaluation (UK BiLEVE) were genotyped using the UK BiLEVE Axiom Array, with the remaining 438,427 participants using the UK Biobank Axiom Array. Data on 805,426 genetic variants were available in 488,377 UK Biobank participants after genotype calling and quality control performed centrally by the UK Biobank team (Bycroft et al., 2018).

Imputation of genetic variants (Bycroft et al., 2018) was performed firstly using data from the Haplotype Reference Consortium (39,235,157 single nucleotide polymorphisms (SNPs)) and secondly using a combined panel from 1000 Genomes Phase 3 and UK10K (87,696,888 bi-allelic markers) using the IMPUTE4 software (<https://jmarchini.org/software/>). 93,095,623 autosomal SNPs, short indels and large structural variants were available in 487,442 participants after extensive quality controls by the central UK Biobank team (Bycroft et al., 2018). Reference SNP IDs (rsIDs) were assigned to variants using data from the UCSC genome annotation database for the GRCh37 assembly of the human genome (<http://hgdownload.cse.ucsc.edu/goldenpath/hg19/database/>).

We selected 451,369 participants identified as ‘white European’ through self-report and verified through principal components (PC) analysis based on genotypes (Pilling et al., 2019). Briefly, PCs were generated in the 1000 Genomes Cohort using high-confidence genetic variants to obtain their individual loadings. These loadings were used to project UK Biobank participants into the same PC space. PCs 1 to 4 were used to identify participants of European descent. Related individuals were identified through kinship analysis.

p.C282Y is a SNP on chromosome 6 (b37 position 26093141, rsID rs1800562) in the *HFE* gene (OMIM #613609). p.H63D is a SNP also in the *HFE* gene (b37 position 26091179, rsID rs1799945). Both are missense variants causing a single amino-acid change in *HFE*. In the UK Biobank participants the SNPs were not correlated ( $R^2=0.015$ ).

rs1800562 was not directly genotyped, therefore imputed p.C282Y genotypes were used. The imputation INFO quality was 0.997; 445,462 participants (98.7% of 451,369) were imputed with 100% confidence. We recoded any imprecise imputation values using the following criteria: 5,724 were recoded (i.e. estimated genotype dose between 0 and 0.25 set to 0, values between 0.75 and 1.25 set to 1, and finally between 1.75 and 2 to 2); 183 participants (0.04%) were excluded due to imprecise imputation, yielding 451,186 participants in analyses.

Exome sequence data from the Illumina NovaSeq 6000 platform (75bp paired-end sequencing with 20x coverage of targeted panel) was available on 49,772 of these participants (<http://biobank.ctsu.ox.ac.uk/crystal/label.cgi?id=170>). *HFE* p.C282Y genotype calls were extracted from the data (FE pipeline (Regier et al., 2018)) and compared to imputed genotype calls, as described above. The correlation coefficient between genotypes from imputation and sequencing was high ( $R^2=0.998$ ) and only one of 231 (0.4%) imputed p.C282Y homozygotes was incorrectly classified in this subset (the sequenced genotype was p.C282Y heterozygote).

### References

- Bycroft, C., Freeman, C., Petkova, D., Band, G., Elliott, L. T., Sharp, K., Motyer, A., Vukcevic, D., Delaneau, O., O’Connell, J., Cortes, A., Welsh, S., Young, A., Effingham, M., McVean, G., Leslie, S., Allen, N., Donnelly, P., & Marchini, J. (2018). The UK Biobank resource with deep phenotyping and genomic data. *Nature*, 562(7726), 203–209. <https://doi.org/10.1038/s41586-018-0579-z>
- Pilling, L. C., Tamosauskaite, J., Jones, G., Wood, A. R., Jones, L., Kuo, C. L., Kuchel, G. A., Ferrucci, L., & Melzer, D. (2019). Common conditions associated with hereditary haemochromatosis genetic variants: cohort study in UK Biobank. *BMJ (Clinical Research Ed.)*, 364, k5222. <https://doi.org/10.1136/bmj.k5222>
- Regier, A. A., Farjoun, Y., Larson, D. E., Krasheninina, O., Kang, H. M., Howrigan, D. P., Chen, B.-J., Kher, M., Banks, E., Ames, D. C., English, A. C., Li, H., Xing, J., Zhang, Y., Matise, T., Abecasis, G. R., Salerno, W., Zody, M. C., Neale, B. M., & Hall, I. M. (2018). Functional equivalence of genome sequencing analysis pipelines enables harmonized variant calling across human genetics projects. *Nature Communications*, 9(1), 4038. <https://doi.org/10.1038/s41467-018-06159-4>

88 **Supplementary Tables**

89

90 ***Supplementary Table 1. Baseline characteristics of sample by those included and those not included in the primary care follow-up sample***

91

|                                      | <b>Primary care<br/>follow-up</b> | <b>Not included in primary<br/>care follow-up</b> | <b>Total</b>   | <b>p-value for<br/>difference</b> |
|--------------------------------------|-----------------------------------|---------------------------------------------------|----------------|-----------------------------------|
| N (%)                                | 209,811 (46.5)                    | 241,375 (53.5)                                    | 451,186        |                                   |
| Age (baseline) - mean (sd)           | 56.7 (8.0)                        | 56.8 (8.0)                                        | 56.8 (8.0)     | <0.001                            |
| Female, n (%)                        | 114,512 (54.6)                    | 130,322 (54.0)                                    | 244,834 (54.3) | <0.001                            |
| C282Y +/- genotype <sup>a</sup>      | 1,382 (0.7)                       | 1,508 (0.6)                                       | 2,890 (0.6)    | 0.10                              |
| Obesity (BMI > 30), n (%)            | 52,848 (25.2)                     | 57,351 (23.8)                                     | 110,199 (24.4) | <0.001                            |
| Waist circumference (cm) - mean (sd) | 90.3 (13.5)                       | 90.2 (13.5)                                       | 90.3 (13.5)    | 0.009                             |
| Diabetes (any type), baseline, n (%) | 9,720 (4.6)                       | 11,190 (4.6)                                      | 20,910 (4.6)   | 0.96                              |
| Current smoker, n (%)                | 21,859 (10.4)                     | 25,036 (10.4)                                     | 46,895 (10.4)  | 0.62                              |
| Consuming alcohol daily, n (%)       | 42,731 (20.4)                     | 52,687 (21.8)                                     | 95,418 (21.2)  | <0.001                            |
| Hepatitis (any), n (%)               | 944 (0.5)                         | 1,284 (0.5)                                       | 2,228 (0.5)    | <0.001                            |
| Cirrhosis, n (%)                     | 125 (0.01)                        | 197 (0.01)                                        | 322 (0.1)      | 0.01                              |

92

93 <sup>a</sup>*HFE* p.C282Y homozygosity.

94 **Supplementary Table 2. Baseline characteristics of sample by all study genotypes and sex**

95

96

| Characteristics                                               | Males         |               |              |              |              |                        | Total         |
|---------------------------------------------------------------|---------------|---------------|--------------|--------------|--------------|------------------------|---------------|
|                                                               | No variants   | H63D+/-       | H63D+/+      | C282Y+/H63D+ | C282Y+/-     | C282Y +/- <sup>a</sup> |               |
| N (total sample)                                              | 122,860       | 47,990        | 4,674        | 4,955        | 24,579       | 1,294                  | 206,352       |
| N (subset with follow-up including primary care records)      | 56,425        | 22,351        | 2,148        | 2,297        | 11,466       | 612                    | 95,299        |
| Age (baseline) - mean (sd)                                    | 57.0 (8.1)    | 57.0 (8.1)    | 57.0 (8.1)   | 57.0 (8.1)   | 57.0 (8.1)   | 56.9 (8.2)             | 57.0 (8.1)    |
| Obesity (BMI > 30), n (%)                                     | 31,767 (25.9) | 12,397 (25.8) | 1,219 (26.1) | 1,223 (24.7) | 6,328 (25.8) | 295 (22.8)             | 53,229 (25.8) |
| Waist circumference (cm) - mean (sd)                          | 97.0 (11.3)   | 97.1 (11.4)   | 97.2 (11.2)  | 97.0 (11.3)  | 97.1 (11.3)  | 96.9 (11.1)            | 97.1 (11.4)   |
| Current smoker, n (%)                                         | 14,953 (12.2) | 5,740 (12.0)  | 579 (12.4)   | 612 (12.4)   | 3,043 (12.4) | 189 (14.6)             | 25,116 (12.2) |
| Consuming alcohol daily, n (%)                                | 32,471 (26.5) | 12,630 (26.3) | 1,242 (26.6) | 1,231 (24.9) | 6,313 (25.7) | 324 (25.1)             | 54,211 (26.3) |
| Polycythemia, n (%) (from baseline blood counts) <sup>b</sup> | 2,386 (2.0)   | 1,073 (2.3)   | 111 (2.5)    | 191 (4.0)    | 627 (2.6)    | 35 (2.8)               | 4,423 (2.20)  |
| <b>Liver enzymes</b>                                          |               |               |              |              |              |                        |               |
| Alanine aminotransferase (>50 U/L), n (%)                     | 7,197 (6.1)   | 2,801 (6.1)   | 302 (6.8)    | 338 (7.1)    | 1,463 (6.2)  | 181 (14.7)             | 12,282 (6.2)  |
| (95% CI)                                                      | (6.0-6.3)     | (5.9-6.4)     | (6.1-7.6)    | (6.4-7.9)    | (5.9-6.6)    | (12.8-16.9)            | (6.1-6.4)     |
| Aspartate aminotransferase (>45 U/L), n (%)                   | 4,814 (4.1)   | 1,861 (4.1)   | 211 (4.8)    | 226 (4.8)    | 1,032 (4.4)  | 129 (10.6)             | 8,273 (4.2)   |
| (95% CI)                                                      | (4.0-4.2)     | (3.9-4.3)     | (4.2-5.4)    | (4.2-5.4)    | (4.2-4.7)    | (8.9-12.4)             | (4.1-4.3)     |
| <b>Prevalent disease</b>                                      |               |               |              |              |              |                        |               |
| Diabetes (any type), n (%)                                    | 7,876 (6.4)   | 3,050 (6.4)   | 293 (6.3)    | 311 (6.3)    | 1,601 (6.5)  | 113 (8.7)              | 13,244 (6.4)  |
| Hepatitis (any), n (%)                                        | 675 (0.6)     | 276 (0.6)     | 28 (0.6)     | 24 (0.5)     | 145 (0.6)    | 5 (0.4)                | 1153 (0.6)    |
| Cirrhosis, n (%)                                              | 85 (0.1)      | 39 (0.1)      | 3 (0.1)      | 2 (<0.1)     | 22 (0.1)     | 6 (0.5)                | 157 (0.1)     |

| Characteristics                                               | Females       |               |              |              |              |                        | Total         |
|---------------------------------------------------------------|---------------|---------------|--------------|--------------|--------------|------------------------|---------------|
|                                                               | No variants   | H63D+/-       | H63D+/+      | C282Y+/H63D+ | C282Y+/-     | C282Y +/- <sup>a</sup> |               |
| N (total sample)                                              | 145,719       | 57,029        | 5,584        | 5,746        | 29,160       | 1,596                  | 244,834       |
| N (subset with follow-up including primary care records)      | 67,916        | 26,632        | 2,640        | 2,754        | 13,800       | 770                    | 114,512       |
| Age (baseline) - mean (sd)                                    | 56.6 (7.9)    | 56.6 (7.9)    | 56.6 (8.1)   | 56.5 (7.9)   | 56.5 (8.0)   | 56.9 (8.0)             | 56.6 (7.9)    |
| Obesity (BMI > 30), n (%)                                     | 33,997 (23.3) | 13,193 (23.1) | 1,358 (24.3) | 1,353 (23.6) | 6715 (23.0)  | 354 (22.2)             | 56,970 (23.3) |
| Waist circumference (cm) - mean (sd)                          | 84.6 (12.5)   | 84.5 (12.4)   | 84.7 (12.6)  | 84.9 (12.6)  | 84.5 (12.5)  | 84.6 (12.5)            | 84.6 (12.5)   |
| Current smoker, n (%)                                         | 12,837 (8.8)  | 5,124 (9.0)   | 537 (9.6)    | 509 (8.9)    | 2,634 (9.0)  | 138 (8.7)              | 21,779 (8.9)  |
| Consuming alcohol daily, n (%)                                | 24,603 (16.9) | 9,675 (17.0)  | 908 (16.3)   | 932 (16.2)   | 4,833 (16.6) | 256 (16.0)             | 41,207 (16.8) |
| Polycythemia, n (%) (from baseline blood counts) <sup>b</sup> | 131 (0.1)     | 81 (0.2)      | 6 (0.1)      | 13 (0.2)     | 36 (0.1)     | 1 (0.1)                | 268 (0.1)     |
| <b>Liver enzymes</b>                                          |               |               |              |              |              |                        |               |
| Alanine aminotransferase (>50 U/L), n (%)                     | 3,041 (2.2)   | 1,177 (2.2)   | 113 (2.1)    | 139 (2.5)    | 645 (2.3)    | 62 (4.1)               | 5,177 (2.2)   |
| (95% CI)                                                      | (2.1-2.3)     | (2.0-2.3)     | (1.8-2.6)    | (2.1-3.0)    | (2.2-2.5)    | (3.1-5.2)              | (2.2-2.3)     |
| Aspartate aminotransferase (>45 U/L), n (%)                   | 2,792 (2.0)   | 1,058 (2.0)   | 107 (2.0)    | 135 (2.5)    | 521 (1.9)    | 54 (3.6)               | 4,667 (2.0)   |
| (95% CI)                                                      | (1.9-2.1)     | (1.8-2.1)     | (1.7-2.4)    | (2.1-2.9)    | (1.7-2.1)    | (2.7-4.6)              | (2.0-2.1)     |
| <b>Prevalent disease</b>                                      |               |               |              |              |              |                        |               |
| Diabetes (any type), n (%)                                    | 4,478 (3.1)   | 1,828 (3.2)   | 185 (3.3)    | 193 (3.4)    | 923 (3.2)    | 59 (3.7)               | 7,666 (3.1)   |
| Hepatitis (any), n (%)                                        | 648 (0.4)     | 243 (0.4)     | 29 (0.5)     | 30 (0.5)     | 120 (0.4)    | 5 (0.3)                | 1075 (0.4)    |
| Cirrhosis, n (%)                                              | 93 (0.1)      | 38 (0.1)      | 7 (0.1)      | 3 (0.1)      | 23 (0.1)     | 1 (0.1)                | 165 (0.1)     |

97

98 Total sample (n=451,186).

99 <sup>a</sup>HFE p.C282Y homozygosity.100 <sup>b</sup>Polycythemia defined as elevated hemoglobin (>16.5 g/dL for men; >16 g/dL for women) and hematocrit (> 49% for men; > 48% for women)<sup>19</sup>.

**Supplementary Table 3. Incident disease and death during follow-up for the entire cohort and primary care subset, by all study genotypes and sex<sup>a</sup>**

| Characteristics                                                           | Males         |               |               |               |               |               | Total         |
|---------------------------------------------------------------------------|---------------|---------------|---------------|---------------|---------------|---------------|---------------|
|                                                                           | No variants   | H63D+/-       | H63D+/+       | C282Y+/H63D+  | C282Y+/-      | C282Y +/+     |               |
| N (total sample) <sup>b</sup>                                             | 122,860       | 47,990        | 4,674         | 4,955         | 24,579        | 1,294         | 206,352       |
| Hemochromatosis diagnosis, baseline, n (%)                                | 30 (<0.1)     | 17 (<0.1)     | 8 (0.2)       | 29 (0.6)      | 27 (0.1)      | 156 (12.1)    | 267 (0.1)     |
| Hemochromatosis diagnosis, end of follow-up (baseline or incident), n (%) | 74 (0.1)      | 47 (0.1)      | 24 (0.5)      | 89 (1.8)      | 54 (0.2)      | 327 (25.3)    | 615 (0.3)     |
| Follow-up time (years), median (IQR)                                      | 8.9 (8.3-9.5) | 8.9 (8.2-9.5) | 8.9 (8.3-9.5) | 8.9 (8.3-9.5) | 8.9 (8.3-9.5) | 8.9 (8.3-9.5) | 8.9 (8.3-9.5) |
| <b>Incident diagnoses, n (%)</b>                                          |               |               |               |               |               |               |               |
| Liver disease (any, non-cancer)                                           | 1,598 (1.3)   | 639 (1.3)     | 58 (1.3)      | 80 (1.6)      | 321 (1.3)     | 48 (3.7)      | 2,744 (1.3)   |
| Fibrosis and Cirrhosis                                                    | 264 (0.2)     | 109 (0.2)     | 11 (0.2)      | 16 (0.3)      | 67 (0.2)      | 17 (1.3)      | 484 (0.2)     |
| Alcoholic liver disease                                                   | 309 (0.3)     | 112 (0.2)     | 13 (0.3)      | 18 (0.4)      | 96 (0.4)      | 8 (0.6)       | 556 (0.3)     |
| Chronic hepatitis                                                         | 23 (<0.1)     | 4 (<0.1)      | 0 (0)         | 2 (<0.1)      | 1 (<0.1)      | 1 (0.1)       | 31 (<0.1)     |
| Hepatitis B                                                               | 44 (<0.1)     | 16 (<0.1)     | 0 (0)         | 3 (0.1)       | 7 (<0.1)      | 0 (0)         | 70 (<0.1)     |
| Hepatitis C                                                               | 53 (<0.1)     | 18 (<0.1)     | 4 (0.1)       | 2 (<0.1)      | 11 (<0.1)     | 0 (0)         | 88 (<0.1)     |
| Liver cancer                                                              | 174 (0.1)     | 82 (0.2)      | 7 (0.2)       | 10 (0.2)      | 37 (0.2)      | 20 (1.6)      | 330 (0.2)     |
| Hepatocellular carcinoma                                                  | 81 (0.1)      | 43 (0.1)      | 3 (0.1)       | 7 (0.1)       | 16 (0.1)      | 14 (1.1)      | 164 (0.1)     |
| Intrahepatic bile duct carcinoma                                          | 63 (0.1)      | 28 (0.1)      | 2 (<0.1)      | 3 (0.1)       | 17 (0.1)      | 5 (0.4)       | 118 (0.1)     |
| <b>Deaths, n (%)</b>                                                      |               |               |               |               |               |               |               |
| All-cause                                                                 | 6,560 (5.3)   | 2,633 (5.5)   | 258 (5.5)     | 260 (5.3)     | 1,345 (5.5)   | 88 (6.8)      | 11,144 (5.4)  |
| Non-cancer liver disease (any)                                            | 141 (0.1)     | 56 (0.1)      | 4 (0.1)       | 5 (0.1)       | 35 (0.1)      | 1 (0.1)       | 242 (0.1)     |
| Liver cancer                                                              | 102 (0.1)     | 41 (0.1)      | 6 (0.1)       | 6 (0.1)       | 18 (0.1)      | 14 (1.1)      | 187 (0.1)     |
| N (subset with follow-up including primary care records) <sup>c</sup>     | 56,425        | 22,351        | 2,148         | 2,297         | 11,466        | 612           | 95,299        |
| <b>Incident diagnosis, n (%)</b>                                          |               |               |               |               |               |               |               |
| Liver disease (any, non-cancer)                                           | 1,448 (2.6)   | 550 (2.5)     | 53 (2.5)      | 64 (2.8)      | 276 (2.4)     | 42 (7.1)      | 2,433 (2.6)   |
| Fibrosis and Cirrhosis                                                    | 148 (0.3)     | 61 (0.3)      | 9 (0.4)       | 10 (0.4)      | 37 (0.3)      | 14 (2.3)      | 279 (0.3)     |
| Alcoholic liver disease                                                   | 272 (0.5)     | 89 (0.4)      | 10 (0.5)      | 12 (0.5)      | 64 (0.6)      | 9 (1.5)       | 456 (0.5)     |
| Liver cancer                                                              | 75 (0.1)      | 43 (0.2)      | 6 (0.3)       | 3 (0.1)       | 16 (0.1)      | 12 (2.0)      | 155 (0.2)     |
| Hepatocellular carcinoma                                                  | 31 (0.1)      | 24 (0.1)      | 3 (0.1)       | 3 (0.1)       | 7 (0.1)       | 6 (1.0)       | 74 (0.1)      |
| Intrahepatic bile duct carcinoma                                          | 31 (0.1)      | 14 (0.1)      | 1 (0.1)       | 0 (0)         | 5 (<0.1)      | 4 (0.7)       | 55 (0.1)      |

| Characteristics                                                           | Females       |               |               |               |               |               | Total         |
|---------------------------------------------------------------------------|---------------|---------------|---------------|---------------|---------------|---------------|---------------|
|                                                                           | No variants   | H63D+/-       | H63D+/+       | C282Y+/H63+   | C282Y+/-      | C282Y +/-     |               |
| N (total sample) <sup>b</sup>                                             | 145,719       | 57,029        | 5,584         | 5,746         | 29,160        | 1,596         | 244,834       |
| Hemochromatosis diagnosis, baseline, n (%)                                | 8 (<0.1)      | 6 (<0.1)      | 2 (<0.1)      | 12 (0.2)      | 5 (<0.1)      | 54 (3.4)      | 87 (<0.1)     |
| Hemochromatosis diagnosis, end of follow-up (baseline or incident), n (%) | 25 (<0.1)     | 26 (<0.1)     | 10 (0.2)      | 35 (0.6)      | 23 (0.1)      | 200 (12.5)    | 319 (0.1)     |
| Follow-up time (years), median (IQR)                                      | 8.9 (8.3-9.5) | 8.9 (8.3-9.5) | 8.9 (8.3-9.5) | 8.9 (8.3-9.5) | 8.9 (8.3-9.5) | 9.0 (8.4-9.5) | 8.9 (8.3-9.5) |
| <b>Incident diagnoses, n (%)</b>                                          |               |               |               |               |               |               |               |
| Liver disease (any, non-cancer)                                           | 1,433 (1.0)   | 583 (1.0)     | 56 (1.0)      | 68 (1.2)      | 310 (1.1)     | 23 (1.5)      | 2,473 (1.0)   |
| Fibrosis and Cirrhosis                                                    | 229 (0.2)     | 70 (0.1)      | 7 (0.1)       | 9 (0.2)       | 42 (0.1)      | 4 (0.3)       | 361 (0.2)     |
| Alcoholic liver disease                                                   | 77 (0.1)      | 29 (0.1)      | 7 (0.1)       | 2 (<0.1)      | 25 (0.1)      | 4 (0.3)       | 144 (0.1)     |
| Chronic hepatitis                                                         | 26 (<0.1)     | 11 (<0.1)     | 2 (<0.1)      | 1 (<0.1)      | 3 (<0.1)      | 1 (0.1)       | 44 (<0.1)     |
| Hepatitis B                                                               | 11 (<0.1)     | 8 (<0.1)      | 0 (0)         | 1 (<0.1)      | 9 (<0.1)      | 1 (0.1)       | 30 (<0.1)     |
| Hepatitis C                                                               | 14 (<0.1)     | 17 (<0.1)     | 1 (<0.1)      | 0 (0)         | 5 (<0.1)      | 1 (0.1)       | 38 (<0.1)     |
| Liver cancer                                                              | 129 (0.1)     | 68 (0.1)      | 4 (0.1)       | 4 (0.1)       | 29 (0.1)      | 3 (0.2)       | 237 (0.1)     |
| Hepatocellular carcinoma                                                  | 30 (<0.1)     | 14 (<0.1)     | 2 (<0.1)      | 0 (0)         | 8 (<0.1)      | 1 (0.1)       | 55 (<0.1)     |
| Intrahepatic bile duct carcinoma                                          | 69 (0.1)      | 39 (0.1)      | 2 (<0.1)      | 3 (0.1)       | 17 (0.1)      | 0 (0)         | 130 (0.1)     |
| <b>Deaths, n (%)</b>                                                      |               |               |               |               |               |               |               |
| All-cause                                                                 | 4,362 (3.0)   | 1,655 (2.9)   | 158 (2.83)    | 154 (2.7)     | 904 (3.1)     | 60 (3.8)      | 7,293 (3.0)   |
| Non-cancer liver disease (any)                                            | 43 (<0.1)     | 15 (<0.1)     | 3 (0.1)       | 2 (<0.1)      | 10 (<0.1)     | 0 (0)         | 73 (<0.1)     |
| Liver cancer                                                              | 78 (<0.1)     | 41 (0.1)      | 4 (0.1)       | 3 (0.1)       | 19 (0.1)      | 3 (0.2)       | 148 (0.1)     |
| N (subset with follow-up including primary care records) <sup>c</sup>     | 67,916        | 26,632        | 2,640         | 2,754         | 13,800        | 770           | 114,512       |
| <b>Incident diagnosis, n (%)</b>                                          |               |               |               |               |               |               |               |
| Liver disease (any, non-cancer)                                           | 1305 (1.9)    | 566 (1.1)     | 60 (2.3)      | 70 (2.6)      | 314 (2.3)     | 22 (2.9)      | 2337 (2.2)    |
| Fibrosis and Cirrhosis                                                    | 151 (0.2)     | 45 (0.2)      | 6 (0.2)       | 6 (0.2)       | 40 (0.3)      | 4 (0.5)       | 252 (0.2)     |
| Alcoholic liver disease                                                   | 72 (0.1)      | 33 (0.1)      | 5 (0.2)       | 4 (0.2)       | 26 (0.2)      | 4 (0.5)       | 144 (0.1)     |
| Liver cancer                                                              | 62 (0.1)      | 28 (0.1)      | 2 (0.1)       | 1 (<0.1)      | 13 (0.1)      | 1 (0.1)       | 107 (0.1)     |
| Hepatocellular carcinoma                                                  | 16 (<0.1)     | 7 (<0.1)      | 1 (<0.1)      | 0 (0)         | 3 (<0.1)      | 0 (0)         | 27 (<0.1)     |
| Intrahepatic bile duct carcinoma                                          | 31 (0.1)      | 16 (0.1)      | 1 (<0.1)      | 1 (<0.1)      | 8 (0.1)       | 0 (0)         | 57 (0.1)      |

103 <sup>a</sup>Excluding individuals with each prevalent diagnosis at baseline only: i.e. the incident liver cancer analysis included participants with baseline non-cancer liver disease.

104 <sup>b</sup>Total sample (n=451,186), follow-up data from Hospital Episode Statistics, the Cancer Registry and Death Records.

105 <sup>c</sup>Subset of participants (n=209,811) with additional follow-up including primary care records.



**Supplementary Table 4. Hazards ratios (95% CI) for incident liver outcomes by C282Y-H63D genotype and sex, adjusted for age, assessment center, genotyping array and PCs 1-10**

| <b>Incident outcome</b>         | <b>Sex</b> | <b>Genotype</b> | <b>Cases</b> | <b>Person years</b> | <b>HR</b> | <b>95% CI</b> | <b>p-value</b> | <b>Incidence rate difference (per 1,000 person years)<sup>a</sup></b> | <b>95% CI</b> |
|---------------------------------|------------|-----------------|--------------|---------------------|-----------|---------------|----------------|-----------------------------------------------------------------------|---------------|
| Liver disease (any, non-cancer) | Females    | No variants     | 1433         | 1160712             | 1.00      |               |                |                                                                       |               |
|                                 |            | H63D+/-         | 583          | 454536              | 1.04      | 0.94-1.14     | 0.44           |                                                                       |               |
|                                 |            | H63D+/+         | 56           | 44436               | 1.02      | 0.78-1.33     | 0.90           |                                                                       |               |
|                                 |            | C282Y+/H63D+    | 68           | 45883               | 1.20      | 0.94-1.53     | 0.15           |                                                                       |               |
|                                 |            | C282Y+/-        | 310          | 232593              | 1.07      | 0.95-1.21     | 0.26           |                                                                       |               |
|                                 |            | C282Y +/+       | 23           | 12783               | 1.42      | 0.94-2.15     | 0.09           | 0.56                                                                  | -0.17-1.3     |
| Liver disease (any, non-cancer) | Males      | No variants     | 1598         | 968897              | 1.00      |               |                |                                                                       |               |
|                                 |            | H63D+/-         | 639          | 377687              | 1.02      | 0.93-1.12     | 0.62           |                                                                       |               |
|                                 |            | H63D+/+         | 58           | 36806               | 0.95      | 0.73-1.24     | 0.72           |                                                                       |               |
|                                 |            | C282Y+/H63D+    | 80           | 38989               | 1.23      | 0.99-1.55     | 0.07           |                                                                       |               |
|                                 |            | C282Y+/-        | 321          | 193889              | 0.99      | 0.88-1.12     | 0.88           |                                                                       |               |
|                                 |            | C282Y +/+       | 48           | 9916                | 2.90      | 2.18-3.87     | <0.001         | 3.19                                                                  | 1.82-4.56     |
| Fibrosis and Cirrhosis          | Females    | No variants     | 229          | 1167594             | 1.00      |               |                |                                                                       |               |
|                                 |            | H63D+/-         | 70           | 457214              | 0.78      | 0.60-1.02     | 0.07           |                                                                       |               |
|                                 |            | H63D+/+         | 7            | 44741               | 0.79      | 0.37-1.68     | 0.55           |                                                                       |               |
|                                 |            | C282Y+/H63D+    | 9            | 46139               | 1.00      | 0.51-1.94     | 0.99           |                                                                       |               |
|                                 |            | C282Y+/-        | 42           | 234142              | 0.91      | 0.66-1.27     | 0.59           |                                                                       |               |
|                                 |            | C282Y +/+       | 4            | 12877               | 1.55      | 0.58-4.18     | 0.38           | 0.11                                                                  | -0.19-0.42    |
| Fibrosis and Cirrhosis          | Males      | No variants     | 264          | 975954              | 1.00      |               |                |                                                                       |               |
|                                 |            | H63D+/-         | 109          | 380491              | 1.05      | 0.84-1.32     | 0.64           |                                                                       |               |
|                                 |            | H63D+/+         | 11           | 37101               | 1.09      | 0.60-2.00     | 0.77           |                                                                       |               |
|                                 |            | C282Y+/H63D+    | 16           | 39423               | 1.46      | 0.88-2.41     | 0.14           |                                                                       |               |
|                                 |            | C282Y+/-        | 67           | 195430              | 1.23      | 0.94-1.61     | 0.13           |                                                                       |               |
|                                 |            | C282Y +/+       | 17           | 10079               | 5.98      | 3.65-9.79     | 0.12           | 1.42                                                                  | 0.61-2.22     |

| Incident outcome        | Sex     | Genotype     | Cases | Person years | HR              | 95% CI     | p-value | Incidence rate difference<br>(per 1,000 person years) <sup>a</sup> |            |
|-------------------------|---------|--------------|-------|--------------|-----------------|------------|---------|--------------------------------------------------------------------|------------|
|                         |         |              |       |              |                 |            |         | 95% CI                                                             |            |
| Alcoholic liver disease | Females | No variants  | 77    | 1168875      | 1.00            |            |         |                                                                    |            |
|                         |         | H63D+/-      | 29    | 457654       | 0.96            | 0.62-1.47  | 0.84    |                                                                    |            |
|                         |         | H63D+/+      | 7     | 44799        | 2.33            | 1.07-5.05  | 0.03    |                                                                    |            |
|                         |         | C282Y+/H63D+ | 2     | 46182        | 0.63            | 0.15-2.55  | 0.51    |                                                                    |            |
|                         |         | C282Y+/-     | 25    | 234315       | 1.54            | 0.98-2.42  | 0.06    |                                                                    |            |
|                         |         | C282Y +/+    | 4     | 12905        | 4.21            | 1.54-11.54 | 0.01    | 0.24                                                               | -0.06-0.55 |
| Alcoholic liver disease | Males   | No variants  | 309   | 975393       | 1.00            |            |         |                                                                    |            |
|                         |         | H63D+/-      | 112   | 380327       | 0.93            | 0.75-1.15  | 0.48    |                                                                    |            |
|                         |         | H63D+/+      | 13    | 37048        | 1.10            | 0.63-1.91  | 0.74    |                                                                    |            |
|                         |         | C282Y+/H63D+ | 18    | 39368        | 1.38            | 0.86-2.22  | 0.19    |                                                                    |            |
|                         |         | C282Y+/-     | 96    | 195272       | 1.48            | 1.18-1.87  | 0.001   |                                                                    |            |
|                         |         | C282Y +/+    | 8     | 10221        | 2.26            | 1.12-4.56  | 0.02    | 0.47                                                               | -0.08-1.01 |
| Chronic hepatitis       | Females | No variants  | 26    | 1168964      | 1.00            |            |         |                                                                    |            |
|                         |         | H63D+/-      | 11    | 457723       | 1.07            | 0.53-2.18  | 0.84    |                                                                    |            |
|                         |         | H63D+/+      | 2     | 44804        | 1.94            | 0.46-8.18  | 0.37    |                                                                    |            |
|                         |         | C282Y+/H63D+ | 1     | 46203        | 0.96            | 0.13-7.12  | 0.97    |                                                                    |            |
|                         |         | C282Y+/-     | 3     | 234423       | 0.57            | 0.17-1.88  | 0.35    |                                                                    |            |
|                         |         | C282Y +/+    | 1     | 12907        | 3.19            | 0.43-23.61 | 0.26    | 0.06                                                               | -0.1-0.21  |
| Chronic hepatitis       | Males   | No variants  | 23    | 977228       | 1.00            |            |         |                                                                    |            |
|                         |         | H63D+/-      | 4     | 381086       | 0.45            | 0.15-1.29  | 0.14    |                                                                    |            |
|                         |         | H63D+/+      | 0     | 37141        | No observations |            |         |                                                                    |            |
|                         |         | C282Y+/H63D+ | 2     | 39455        | 2.33            | 0.55-9.95  | 0.25    |                                                                    |            |
|                         |         | C282Y+/-     | 1     | 195772       | 0.23            | 0.03-1.74  | 0.16    |                                                                    |            |
|                         |         | C282Y +/+    | 1     | 10277        | 4.69            | 0.62-35.29 | 0.13    | 0.07                                                               | -0.12-0.26 |

| Incident outcome | Sex     | Genotype     | Cases | Person years | HR              | 95% CI     | p-value | Incidence rate difference (per 1,000 person years) <sup>a</sup> |             |
|------------------|---------|--------------|-------|--------------|-----------------|------------|---------|-----------------------------------------------------------------|-------------|
|                  |         |              |       |              |                 |            |         | 95% CI                                                          |             |
| Hepatitis B      | Females | No variants  | 11    | 1169150      | 1.00            |            |         |                                                                 |             |
|                  |         | H63D+/-      | 8     | 457783       | 1.87            | 0.75-4.65  | 0.18    |                                                                 |             |
|                  |         | H63D+/+      | 0     | 44824        | No observations |            |         |                                                                 |             |
|                  |         | C282Y+/H63D+ | 1     | 46202        | 2.74            | 0.35-21.38 | 0.34    |                                                                 |             |
|                  |         | C282Y+/-     | 9     | 234466       | 4.54            | 1.86-11.07 | <0.001  |                                                                 |             |
|                  |         | C282Y +/+    | 1     | 12914        | 8.37            | 1.06-66.03 | 0.04    | 0.07                                                            | -0.08-0.22  |
| Hepatitis B      | Males   | No variants  | 44    | 976948       | 1.00            |            |         |                                                                 |             |
|                  |         | H63D+/-      | 16    | 380918       | 0.92            | 0.52-1.64  | 0.79    |                                                                 |             |
|                  |         | H63D+/+      | 0     | 37131        | No observations |            |         |                                                                 |             |
|                  |         | C282Y+/H63D+ | 3     | 39484        | 1.71            | 0.53-5.52  | 0.37    |                                                                 |             |
|                  |         | C282Y+/-     | 7     | 195682       | 0.80            | 0.36-1.79  | 0.59    |                                                                 |             |
|                  |         | C282Y +/+    | 0     | 10280        | No observations |            |         | -0.05                                                           | -0.06--0.03 |
| Hepatitis C      | Females | No variants  | 14    | 1168797      | 1.00            |            |         |                                                                 |             |
|                  |         | H63D+/-      | 17    | 457667       | 3.14            | 1.55-6.38  | 0.002   |                                                                 |             |
|                  |         | H63D+/+      | 1     | 44792        | 1.91            | 0.25-14.54 | 0.53    |                                                                 |             |
|                  |         | C282Y+/H63D+ | 0     | 46208        | No observations |            |         |                                                                 |             |
|                  |         | C282Y+/-     | 5     | 234431       | 1.77            | 0.63-4.93  | 0.28    |                                                                 |             |
|                  |         | C282Y +/+    | 1     | 12909        | 6.56            | 0.86-50.31 | 0.07    | 0.07                                                            | -0.09-0.22  |
| Hepatitis C      | Males   | No variants  | 53    | 976467       | 1.00            |            |         |                                                                 |             |
|                  |         | H63D+/-      | 18    | 380825       | 0.87            | 0.51-1.49  | 0.61    |                                                                 |             |
|                  |         | H63D+/+      | 4     | 37108        | 1.92            | 0.70-5.32  | 0.21    |                                                                 |             |
|                  |         | C282Y+/H63D+ | 2     | 39451        | 0.93            | 0.23-3.83  | 0.92    |                                                                 |             |
|                  |         | C282Y+/-     | 11    | 195567       | 1.05            | 0.55-2.02  | 0.88    |                                                                 |             |
|                  |         | C282Y +/+    | 0     | 10271        | No observations |            |         | -0.05                                                           | -0.07--0.04 |

| Incident outcome         | Sex     | Genotype     | Cases | Person years | HR              | 95% CI     | p-value | Incidence rate difference (per 1,000 person years) <sup>a</sup> |            |
|--------------------------|---------|--------------|-------|--------------|-----------------|------------|---------|-----------------------------------------------------------------|------------|
|                          |         |              |       |              |                 |            |         | 95% CI                                                          |            |
| Liver cancer             | Females | No variants  | 129   | 1033722      | 1.00            |            |         |                                                                 |            |
|                          |         | H63D+/-      | 68    | 404740       | 1.36            | 1.01-1.82  | 0.04    |                                                                 |            |
|                          |         | H63D+/+      | 4     | 39619        | 0.81            | 0.30-2.20  | 0.68    |                                                                 |            |
|                          |         | C282Y+/H63D+ | 4     | 40867        | 0.80            | 0.30-2.16  | 0.66    |                                                                 |            |
|                          |         | C282Y+/-     | 29    | 207412       | 1.13            | 0.75-1.68  | 0.57    |                                                                 |            |
|                          |         | C282Y +/+    | 3     | 11436        | 2.06            | 0.66-6.49  | 0.22    | 0.14                                                            | -0.16-0.44 |
| Liver cancer             | Males   | No variants  | 174   | 865267       | 1.00            |            |         |                                                                 |            |
|                          |         | H63D+/-      | 82    | 337446       | 1.20            | 0.92-1.56  | 0.17    |                                                                 |            |
|                          |         | H63D+/+      | 7     | 32903        | 1.06            | 0.50-2.26  | 0.88    |                                                                 |            |
|                          |         | C282Y+/H63D+ | 10    | 34965        | 1.40            | 0.74-2.65  | 0.30    |                                                                 |            |
|                          |         | C282Y+/-     | 37    | 173376       | 1.03            | 0.72-1.47  | 0.88    |                                                                 |            |
|                          |         | C282Y +/+    | 20    | 9111         | 10.47           | 6.56-16.69 | <0.001  | 1.99                                                            | 1.03-2.96  |
| Hepatocellular carcinoma | Females | No variants  | 30    | 1033754      | 1.00            |            |         |                                                                 |            |
|                          |         | H63D+/-      | 14    | 404761       | 1.19            | 0.63-2.25  | 0.59    |                                                                 |            |
|                          |         | H63D+/+      | 2     | 39619        | 1.70            | 0.41-7.13  | 0.47    |                                                                 |            |
|                          |         | C282Y+/H63D+ | 0     | 40868        | No observations |            |         |                                                                 |            |
|                          |         | C282Y+/-     | 8     | 207425       | 1.33            | 0.61-2.91  | 0.48    |                                                                 |            |
|                          |         | C282Y +/+    | 1     | 11436        | 3.00            | 0.41-22.06 | 0.28    | 0.06                                                            | -0.11-0.23 |
| Hepatocellular carcinoma | Males   | No variants  | 81    | 865309       | 1.00            |            |         |                                                                 |            |
|                          |         | H63D+/-      | 43    | 337457       | 1.35            | 0.93-1.95  | 0.11    |                                                                 |            |
|                          |         | H63D+/+      | 3     | 32909        | 0.98            | 0.31-3.09  | 0.97    |                                                                 |            |
|                          |         | C282Y+/H63D+ | 7     | 34965        | 2.09            | 0.97-4.54  | 0.06    |                                                                 |            |
|                          |         | C282Y+/-     | 16    | 173380       | 0.94            | 0.55-1.61  | 0.83    |                                                                 |            |
|                          |         | C282Y +/+    | 14    | 9115         | 15.54           | 8.76-27.57 | <0.001  | 1.44                                                            | 0.64-2.25  |

| <b>Incident outcome</b>          | <b>Sex</b> | <b>Genotype</b> | <b>Cases</b> | <b>Person years</b> | <b>HR</b>       | <b>95% CI</b> | <b>p-value</b> | <b>Incidence rate difference (per 1,000 person years)<sup>a</sup></b> | <b>95% CI</b> |
|----------------------------------|------------|-----------------|--------------|---------------------|-----------------|---------------|----------------|-----------------------------------------------------------------------|---------------|
| Intrahepatic bile duct carcinoma | Females    | No variants     | 69           | 1033717             | 1.00            |               |                |                                                                       |               |
|                                  |            | H63D+/-         | 39           | 404742              | 1.46            | 0.98-2.16     | 0.06           |                                                                       |               |
|                                  |            | H63D+/+         | 2            | 39619               | 0.76            | 0.19-3.11     | 0.70           |                                                                       |               |
|                                  |            | C282Y+/H63D+    | 3            | 40867               | 1.11            | 0.35-3.52     | 0.86           |                                                                       |               |
|                                  |            | C282Y+/-        | 17           | 207416              | 1.23            | 0.72-2.09     | 0.45           |                                                                       |               |
|                                  |            | C282Y +/+       | 0            | 11437               | No observations |               |                | -0.07                                                                 | -0.08--0.05   |
| Intrahepatic bile duct carcinoma | Males      | No variants     | 63           | 865306              | 1.00            |               |                |                                                                       |               |
|                                  |            | H63D+/-         | 28           | 337479              | 1.14            | 0.73-1.77     | 0.57           |                                                                       |               |
|                                  |            | H63D+/+         | 2            | 32905               | 0.83            | 0.20-3.39     | 0.79           |                                                                       |               |
|                                  |            | C282Y+/H63D+    | 3            | 34967               | 1.15            | 0.36-3.65     | 0.82           |                                                                       |               |
|                                  |            | C282Y+/-        | 17           | 173381              | 1.31            | 0.76-2.24     | 0.33           |                                                                       |               |
|                                  |            | C282Y +/+       | 5            | 9126                | 7.18            | 2.87-17.99    | <0.001         | 0.48                                                                  | -0.01-0.96    |

110

111

112

113

114

115

Total sample (n=451,186), follow-up data from Hospital Episode Statistics, the Cancer Registry and Death Records.

Hazard ratios adjusted for age, assessment center, genotyping array and population genetics sub-structure using principal components.

Excluding individuals with each prevalent diagnosis at baseline only: i.e. the incident liver cancer analysis included participants with baseline non-cancer liver disease.

<sup>a</sup>Incident rate difference is the difference in incidence between participants with no variants and C282Y homozygotes (C282Y +/+).

116  
117  
118

**Supplementary Table 5. Hazards ratios (95% CI) for incident liver outcomes by C282Y-H63D genotype and sex, adjusted for age, assessment center, genotyping array and PCs 1-10 (in subset with primary care follow-up)**

| <b>Incident outcome</b>         | <b>Sex</b> | <b>Genotype</b> | <b>Cases</b> | <b>Person years</b> | <b>HR</b> | <b>95% CI</b> | <b>p-value</b> |
|---------------------------------|------------|-----------------|--------------|---------------------|-----------|---------------|----------------|
| Liver disease (any, non-cancer) | Females    | No variants     | 1305         | 534640              | 1.00      |               |                |
|                                 |            | H63D+/-         | 566          | 209846              | 1.11      | 1.00-1.22     | 0.05           |
|                                 |            | H63D+/+         | 60           | 20730               | 1.19      | 0.92-1.54     | 0.19           |
|                                 |            | C282Y+/H63D+    | 70           | 21777               | 1.33      | 1.05-1.69     | 0.02           |
|                                 |            | C282Y+/-        | 314          | 108807              | 1.18      | 1.05-1.34     | 0.01           |
|                                 |            | C282Y +/+       | 22           | 6124                | 1.47      | 0.97-2.25     | 0.07           |
| Liver disease (any, non-cancer) | Males      | No variants     | 1448         | 439531              | 1.00      |               |                |
|                                 |            | H63D+/-         | 550          | 173847              | 0.96      | 0.87-1.06     | 0.39           |
|                                 |            | H63D+/+         | 53           | 16789               | 0.96      | 0.73-1.27     | 0.78           |
|                                 |            | C282Y+/H63D+    | 64           | 17976               | 1.08      | 0.84-1.38     | 0.56           |
|                                 |            | C282Y+/-        | 276          | 89540               | 0.93      | 0.82-1.06     | 0.29           |
|                                 |            | C282Y +/+       | 42           | 4578                | 2.80      | 2.06-3.80     | <0.001         |
| Fibrosis and Cirrhosis          | Females    | No variants     | 151          | 540199              | 1.00      |               |                |
|                                 |            | H63D+/-         | 45           | 212177              | 0.75      | 0.54-1.05     | 0.10           |
|                                 |            | H63D+/+         | 6            | 21009               | 1.01      | 0.45-2.29     | 0.97           |
|                                 |            | C282Y+/H63D+    | 6            | 22030               | 0.98      | 0.43-2.22     | 0.97           |
|                                 |            | C282Y+/-        | 40           | 110108              | 1.29      | 0.91-1.83     | 0.15           |
|                                 |            | C282Y +/+       | 4            | 6186                | 2.28      | 0.84-6.17     | 0.10           |
| Fibrosis and Cirrhosis          | Males      | No variants     | 148          | 445246              | 1.00      |               |                |
|                                 |            | H63D+/-         | 61           | 176047              | 1.04      | 0.77-1.40     | 0.81           |
|                                 |            | H63D+/+         | 9            | 16972               | 1.59      | 0.81-3.12     | 0.18           |
|                                 |            | C282Y+/H63D+    | 10           | 18259               | 1.60      | 0.84-3.04     | 0.15           |
|                                 |            | C282Y+/-        | 37           | 90668               | 1.18      | 0.82-1.69     | 0.38           |
|                                 |            | C282Y +/+       | 14           | 4713                | 8.14      | 4.69-14.13    | <0.001         |
| Alcoholic liver disease         | Females    | No variants     | 72           | 540835              | 1.00      |               |                |
|                                 |            | H63D+/-         | 33           | 212385              | 1.16      | 0.77-1.76     | 0.47           |
|                                 |            | H63D+/+         | 5            | 21030               | 1.79      | 0.72-4.44     | 0.21           |
|                                 |            | C282Y+/H63D+    | 4            | 22032               | 1.35      | 0.49-3.70     | 0.56           |
|                                 |            | C282Y+/-        | 26           | 110221              | 1.77      | 1.13-2.78     | 0.01           |
|                                 |            | C282Y +/+       | 4            | 6209                | 4.85      | 1.77-13.31    | 0.002          |
| Alcoholic liver disease         | Males      | No variants     | 272          | 444633              | 1.00      |               |                |
|                                 |            | H63D+/-         | 89           | 175873              | 0.82      | 0.65-1.05     | 0.11           |
|                                 |            | H63D+/+         | 10           | 16943               | 0.97      | 0.52-1.83     | 0.94           |
|                                 |            | C282Y+/H63D+    | 12           | 18240               | 1.05      | 0.59-1.87     | 0.87           |
|                                 |            | C282Y+/-        | 64           | 90508               | 1.11      | 0.84-1.46     | 0.45           |
|                                 |            | C282Y +/+       | 9            | 4782                | 2.91      | 1.49-5.66     | 0.002          |

119  
120

| <b>Incident outcome</b>          | <b>Sex</b> | <b>Genotype</b> | <b>Cases</b> | <b>Person years</b> | <b>HR</b>       | <b>95% CI</b> | <b>p-value</b> |
|----------------------------------|------------|-----------------|--------------|---------------------|-----------------|---------------|----------------|
| Liver cancer                     | Females    | No variants     | 62           | 480508              | 1.00            |               |                |
|                                  |            | H63D+/-         | 28           | 188686              | 1.16            | 0.74-1.82     | 0.51           |
|                                  |            | H63D+/+         | 2            | 18687               | 0.83            | 0.20-3.40     | 0.80           |
|                                  |            | C282Y+/H63D+    | 1            | 19589               | 0.39            | 0.05-2.81     | 0.35           |
|                                  |            | C282Y+/-        | 13           | 98014               | 1.03            | 0.57-1.87     | 0.93           |
|                                  |            | C282Y +/+       | 1            | 5522                | 1.44            | 0.20-10.41    | 0.72           |
| Liver cancer                     | Males      | No variants     | 75           | 396487              | 1.00            |               |                |
|                                  |            | H63D+/-         | 43           | 156770              | 1.44            | 0.99-2.09     | 0.06           |
|                                  |            | H63D+/+         | 6            | 15117               | 2.09            | 0.91-4.81     | 0.08           |
|                                  |            | C282Y+/H63D+    | 3            | 16272               | 1.00            | 0.32-3.18     | 1.00           |
|                                  |            | C282Y+/-        | 16           | 80735               | 1.02            | 0.59-1.75     | 0.95           |
|                                  |            | C282Y +/+       | 12           | 4314                | 14.11           | 7.62-26.12    | <0.001         |
| Hepatocellular carcinoma         | Females    | No variants     | 16           | 480540              | 1.00            |               |                |
|                                  |            | H63D+/-         | 7            | 188692              | 1.13            | 0.47-2.76     | 0.78           |
|                                  |            | H63D+/+         | 1            | 18687               | 1.52            | 0.20-11.49    | 0.68           |
|                                  |            | C282Y+/H63D+    | 0            | 19589               | No observations |               |                |
|                                  |            | C282Y+/-        | 3            | 98021               | 0.94            | 0.27-3.22     | 0.92           |
|                                  |            | C282Y +/+       | 0            | 5522                | No observations |               |                |
| Hepatocellular carcinoma         | Males      | No variants     | 31           | 396507              | 1.00            |               |                |
|                                  |            | H63D+/-         | 24           | 156778              | 1.94            | 1.14-3.31     | 0.02           |
|                                  |            | H63D+/+         | 3            | 15117               | 2.61            | 0.80-8.53     | 0.11           |
|                                  |            | C282Y+/H63D+    | 3            | 16272               | 2.38            | 0.73-7.79     | 0.15           |
|                                  |            | C282Y+/-        | 7            | 80738               | 1.07            | 0.47-2.44     | 0.87           |
|                                  |            | C282Y +/+       | 6            | 4319                | 16.78           | 6.94-40.57    | <0.001         |
| Intrahepatic bile duct carcinoma | Females    | No variants     | 31           | 480517              | 1.00            |               |                |
|                                  |            | H63D+/-         | 16           | 188686              | 1.33            | 0.72-2.42     | 0.36           |
|                                  |            | H63D+/+         | 1            | 18687               | 0.83            | 0.11-6.05     | 0.85           |
|                                  |            | C282Y+/H63D+    | 1            | 19589               | 0.80            | 0.11-5.85     | 0.82           |
|                                  |            | C282Y+/-        | 8            | 98015               | 1.29            | 0.59-2.81     | 0.52           |
|                                  |            | C282Y +/+       | 0            | 5522                | No observations |               |                |
| Intrahepatic bile duct carcinoma | Males      | No variants     | 31           | 396505              | 1.00            |               |                |
|                                  |            | H63D+/-         | 14           | 156796              | 1.13            | 0.60-2.13     | 0.71           |
|                                  |            | H63D+/+         | 1            | 15119               | 0.83            | 0.11-6.07     | 0.85           |
|                                  |            | C282Y+/H63D+    | 0            | 16273               | No observations |               |                |
|                                  |            | C282Y+/-        | 5            | 80734               | 0.78            | 0.30-2.01     | 0.60           |
|                                  |            | C282Y +/+       | 4            | 4316                | 11.18           | 3.87-32.24    | <0.001         |

121

122

123 Subset of participants (n=209,811) with additional follow-up including primary care records.

124 Hazard ratios adjusted for age, assessment center, genotyping array and population genetics sub-structure using  
125 principal components.126 Excluding individuals with each prevalent diagnosis at baseline only: i.e. the incident liver cancer analysis included  
127 participants with baseline non-cancer liver disease.

128  
129

**Supplementary Table 6.** Lifetable estimates for incident liver disease (any, non-cancer) by sex and HFE genotypes (no variants vs C282Y homozygotes)

| Age interval, years | No variants |                   |                        |        |      | C282Y homozygotes |                   |                        |        |      | Excess proportion (%) |
|---------------------|-------------|-------------------|------------------------|--------|------|-------------------|-------------------|------------------------|--------|------|-----------------------|
|                     | Failures    | Survival Function | Incident diagnosis (%) | 95% CI |      | Failures          | Survival Function | Incident diagnosis (%) | 95% CI |      |                       |
| <b>Males</b>        |             |                   |                        |        |      |                   |                   |                        |        |      |                       |
| 40-45               | 25          | 0.99              | 1.0                    | 0.6    | 1.7  | 0                 | 1.00              |                        |        |      |                       |
| 46-50               | 103         | 0.98              | 2.3                    | 1.8    | 2.9  | 3                 | 0.97              | 2.7                    | 0.9    | 8.3  | 0.5                   |
| 51-55               | 146         | 0.97              | 3.5                    | 3.0    | 4.2  | 4                 | 0.94              | 6.2                    | 3.0    | 12.5 | 2.7                   |
| 56-60               | 231         | 0.95              | 5.1                    | 4.6    | 5.8  | 7                 | 0.89              | 10.9                   | 6.6    | 17.7 | 5.7                   |
| 61-65               | 293         | 0.93              | 6.7                    | 6.1    | 7.4  | 13                | 0.83              | 17.4                   | 12.2   | 24.5 | 10.7                  |
| 66-70               | 373         | 0.92              | 8.4                    | 7.8    | 9.1  | 10                | 0.79              | 21.2                   | 15.7   | 28.2 | 12.8                  |
| 71-75               | 233         | 0.90              | 10.2                   | 9.5    | 10.9 | 3                 | 0.77              | 22.7                   | 17.1   | 29.9 | 12.5                  |
| <b>Females</b>      |             |                   |                        |        |      |                   |                   |                        |        |      |                       |
| 40-45               | 15          | 1.00              | 0.4                    | 0.2    | 0.8  | 0                 | 1.00              |                        |        |      |                       |
| 46-50               | 66          | 0.99              | 1.1                    | 0.8    | 1.5  | 1                 | 0.99              | 0.8                    | 0.1    | 5.9  | -0.3                  |
| 51-55               | 155         | 0.98              | 2.2                    | 1.8    | 2.5  | 1                 | 0.99              | 1.4                    | 0.3    | 5.7  | -0.7                  |
| 56-60               | 230         | 0.97              | 3.4                    | 3.1    | 3.8  | 4                 | 0.97              | 3.4                    | 1.5    | 7.5  | 0.0                   |
| 61-65               | 251         | 0.95              | 4.5                    | 4.1    | 4.9  | 5                 | 0.95              | 5.5                    | 3.0    | 9.8  | 1.0                   |
| 66-70               | 329         | 0.94              | 5.8                    | 5.4    | 6.3  | 4                 | 0.93              | 6.9                    | 4.1    | 11.3 | 1.0                   |
| 71-75               | 215         | 0.93              | 7.3                    | 6.9    | 7.8  | 6                 | 0.90              | 9.7                    | 6.3    | 14.7 | 2.4                   |

130

131 Lifetable projections based on observed 5 year age-group specific incidence rates from ages 40 and 75 years e.g. in male p.C282Y homozygotes, 22.7% were projected to  
132 develop liver disease by age 75, compared to 10.2% without HFE variants (excess proportion 12.5%).

133 Liver disease estimates based on subset of participants with primary care data (n=209,811). Excluding individuals with prevalent diagnosis at baseline.



134  
135  
136

**Supplementary Table 7. Hazards ratios (95% CI) for mortality by C282Y-H63D genotype and sex, adjusted for age, assessment center, genotyping array and PCs 1-10**

| Death                           | Sex     | Genotype     | Cases | Person years | HR              | 95% CI     | p-value |
|---------------------------------|---------|--------------|-------|--------------|-----------------|------------|---------|
| All-cause                       | Females | No variants  | 4349  | 1286786      | 1.00            |            |         |
|                                 |         | H63D+/-      | 1650  | 503708       | 0.97            | 0.92-1.03  | 0.35    |
|                                 |         | H63D+/+      | 158   | 49303        | 0.94            | 0.80-1.10  | 0.45    |
|                                 |         | C282Y+/H63D+ | 154   | 50787        | 0.90            | 0.76-1.05  | 0.19    |
|                                 |         | C282Y+/-     | 899   | 257676       | 1.03            | 0.95-1.10  | 0.48    |
|                                 |         | C282Y +/+    | 60    | 14152        | 1.18            | 0.91-1.52  | 0.20    |
| All-cause                       | Males   | No variants  | 6539  | 1074517      | 1.00            |            |         |
|                                 |         | H63D+/-      | 2628  | 418951       | 1.02            | 0.98-1.07  | 0.30    |
|                                 |         | H63D+/+      | 258   | 40833        | 1.04            | 0.92-1.17  | 0.56    |
|                                 |         | C282Y+/H63D+ | 258   | 43330        | 0.96            | 0.85-1.09  | 0.51    |
|                                 |         | C282Y+/-     | 1338  | 214940       | 1.00            | 0.94-1.06  | 0.90    |
|                                 |         | C282Y +/+    | 88    | 11271        | 1.24            | 1.00-1.53  | 0.046   |
| Liver disease (any, non cancer) | Females | No variants  | 43    | 1286786      | 1.00            |            |         |
|                                 |         | H63D+/-      | 15    | 503708       | 0.89            | 0.50-1.60  | 0.70    |
|                                 |         | H63D+/+      | 3     | 49303        | 1.84            | 0.57-5.92  | 0.31    |
|                                 |         | C282Y+/H63D+ | 2     | 50787        | 1.13            | 0.27-4.67  | 0.87    |
|                                 |         | C282Y+/-     | 10    | 257676       | 1.11            | 0.55-2.21  | 0.77    |
|                                 |         | C282Y +/+    | 0     | 14152        | No observations |            |         |
| Liver disease (any, non cancer) | Males   | No variants  | 141   | 1074517      | 1.00            |            |         |
|                                 |         | H63D+/-      | 56    | 418951       | 1.01            | 0.74-1.37  | 0.96    |
|                                 |         | H63D+/+      | 4     | 40833        | 0.73            | 0.27-1.98  | 0.54    |
|                                 |         | C282Y+/H63D+ | 5     | 43330        | 0.81            | 0.33-1.99  | 0.65    |
|                                 |         | C282Y+/-     | 35    | 214940       | 1.16            | 0.80-1.68  | 0.44    |
|                                 |         | C282Y +/+    | 1     | 11271        | 0.59            | 0.08-4.21  | 0.60    |
| Liver cancer                    | Females | No variants  | 78    | 1286786      | 1.00            |            |         |
|                                 |         | H63D+/-      | 41    | 503708       | 1.36            | 0.93-1.98  | 0.12    |
|                                 |         | H63D+/+      | 4     | 49303        | 1.35            | 0.49-3.69  | 0.56    |
|                                 |         | C282Y+/H63D+ | 3     | 50787        | 0.99            | 0.31-3.15  | 0.99    |
|                                 |         | C282Y+/-     | 19    | 257676       | 1.21            | 0.74-2.01  | 0.45    |
|                                 |         | C282Y +/+    | 3     | 14152        | 3.36            | 1.06-10.67 | 0.04    |
| Liver cancer                    | Males   | No variants  | 102   | 1074517      | 1.00            |            |         |
|                                 |         | H63D+/-      | 41    | 418951       | 1.02            | 0.71-1.47  | 0.91    |
|                                 |         | H63D+/+      | 6     | 40833        | 1.53            | 0.67-3.48  | 0.31    |
|                                 |         | C282Y+/H63D+ | 6     | 43330        | 1.42            | 0.62-3.23  | 0.41    |
|                                 |         | C282Y+/-     | 18    | 214940       | 0.84            | 0.51-1.39  | 0.50    |
|                                 |         | C282Y +/+    | 14    | 11271        | 11.91           | 6.77-20.97 | <0.001  |

137

138  
139  
140  
141

Total sample (n=451,186), follow-up data from Death Records.  
Hazard ratios adjusted for age, assessment center, genotyping array and population genetics sub-structure using principal components.

142  
143  
144

**Supplementary Table 8.** Hazards ratios (95% CI) for incident liver outcomes by C282Y-H63D genotype and sex, adjusted for age, assessment center, genotyping array and PCs 1-10 (excluding prevalent haemochromatosis)

| <b>Incident outcome</b> | <b>Sex</b> | <b>Genotype</b> | <b>Cases</b> | <b>Person years</b> | <b>HR</b> | <b>95% CI</b> | <b>p-value</b> |
|-------------------------|------------|-----------------|--------------|---------------------|-----------|---------------|----------------|
| Liver disease (any)     | Females    | No variants     | 1432         | 1160667             | 1.00      |               |                |
|                         |            | H63D+/-         | 583          | 454491              | 1.04      | 0.94-1.14     | 0.44           |
|                         |            | H63D++          | 56           | 44421               | 1.02      | 0.78-1.33     | 0.89           |
|                         |            | C282Y+/H63+     | 66           | 45813               | 1.16      | 0.91-1.49     | 0.23           |
|                         |            | C282Y+/-        | 310          | 232553              | 1.07      | 0.95-1.21     | 0.26           |
|                         |            | C282Y ++        | 20           | 12406               | 1.28      | 0.82-1.99     | 0.27           |
| Liver disease (any)     | Males      | No variants     | 1598         | 968731              | 1.00      |               |                |
|                         |            | H63D+/-         | 638          | 377594              | 1.02      | 0.93-1.12     | 0.64           |
|                         |            | H63D++          | 57           | 36741               | 0.94      | 0.72-1.22     | 0.64           |
|                         |            | C282Y+/H63D+    | 78           | 38820               | 1.21      | 0.96-1.52     | 0.10           |
|                         |            | C282Y+/-        | 319          | 193730              | 0.98      | 0.87-1.11     | 0.80           |
|                         |            | C282Y ++        | 41           | 8948                | 2.76      | 2.02-3.76     | <0.001         |
| Fibrosis and Cirrhosis  | Females    | No variants     | 228          | 1167543             | 1.00      |               |                |
|                         |            | H63D+/-         | 70           | 457169              | 0.78      | 0.6-1.02      | 0.07           |
|                         |            | H63D++          | 7            | 44726               | 0.80      | 0.38-1.69     | 0.55           |
|                         |            | C282Y+/H63+     | 9            | 46053               | 1.00      | 0.51-1.95     | 1.00           |
|                         |            | C282Y+/-        | 42           | 234102              | 0.92      | 0.66-1.28     | 0.61           |
|                         |            | C282Y ++        | 4            | 12460               | 1.62      | 0.60-4.36     | 0.34           |
| Fibrosis and Cirrhosis  | Males      | No variants     | 264          | 975773              | 1.00      |               |                |
|                         |            | H63D+/-         | 108          | 380375              | 1.04      | 0.84-1.31     | 0.70           |
|                         |            | H63D++          | 11           | 37034               | 1.10      | 0.60-2.00     | 0.77           |
|                         |            | C282Y+/H63D+    | 16           | 39204               | 1.47      | 0.88-2.43     | 0.14           |
|                         |            | C282Y+/-        | 67           | 195255              | 1.23      | 0.94-1.61     | 0.13           |
|                         |            | C282Y ++        | 13           | 9038                | 5.17      | 2.96-9.05     | 0.00           |
| Alcoholic liver disease | Females    | No variants     | 76           | 1168823             | 1.00      |               |                |
|                         |            | H63D+/-         | 29           | 457610              | 0.97      | 0.63-1.48     | 0.88           |
|                         |            | H63D++          | 7            | 44784               | 2.36      | 1.09-5.12     | 0.03           |
|                         |            | C282Y+/H63+     | 2            | 46103               | 0.63      | 0.16-2.59     | 0.53           |
|                         |            | C282Y+/-        | 25           | 234275              | 1.56      | 0.99-2.46     | 0.06           |
|                         |            | C282Y ++        | 3            | 12473               | 3.32      | 1.05-10.57    | 0.04           |
| Alcoholic liver disease | Males      | No variants     | 308          | 975209              | 1.00      |               |                |
|                         |            | H63D+/-         | 111          | 380219              | 0.92      | 0.74-1.14     | 0.45           |
|                         |            | H63D++          | 13           | 36981               | 1.11      | 0.63-1.93     | 0.72           |
|                         |            | C282Y+/H63D+    | 17           | 39157               | 1.31      | 0.81-2.14     | 0.27           |
|                         |            | C282Y+/-        | 96           | 195079              | 1.49      | 1.18-1.87     | 0.00           |
|                         |            | C282Y ++        | 4            | 9064                | 1.28      | 0.48-3.44     | 0.62           |

145

| <b>Incident outcome</b> | <b>Sex</b> | <b>Genotype</b> | <b>Cases</b> | <b>Person years</b> | <b>HR</b>       | <b>95% CI</b> | <b>p-value</b> |
|-------------------------|------------|-----------------|--------------|---------------------|-----------------|---------------|----------------|
| Chronic hepatitis       | Females    | No variants     | 26           | 1168914             | 1.00            |               |                |
|                         |            | H63D+/-         | 11           | 457678              | 1.07            | 0.53-2.17     | 0.84           |
|                         |            | H63D+/+         | 2            | 44789               | 1.93            | 0.46-8.14     | 0.37           |
|                         |            | C282Y+/H63D+    | 1            | 46117               | 0.96            | 0.13-7.08     | 0.97           |
|                         |            | C282Y+/-        | 3            | 234382              | 0.56            | 0.17-1.87     | 0.35           |
|                         |            | C282Y +/+       | 0            | 12478               | No observations |               |                |
| Chronic hepatitis       | Males      | No variants     | 23           | 977030              | 1.00            |               |                |
|                         |            | H63D+/-         | 4            | 380967              | 0.45            | 0.15-1.29     | 0.14           |
|                         |            | H63D+/+         | 0            | 37074               | No observations |               |                |
|                         |            | C282Y+/H63D+    | 2            | 39229               | 2.35            | 0.55-10.01    | 0.25           |
|                         |            | C282Y+/-        | 1            | 195564              | 0.23            | 0.03-1.74     | 0.16           |
|                         |            | C282Y +/+       | 1            | 9088                | 5.24            | 0.70-39.47    | 0.11           |
| Hepatitis B             | Females    | No variants     | 11           | 1169092             | 1.00            |               |                |
|                         |            | H63D+/-         | 8            | 457739              | 1.87            | 0.75-4.64     | 0.18           |
|                         |            | H63D+/+         | 0            | 44809               | No observations |               |                |
|                         |            | C282Y+/H63D+    | 1            | 46116               | 2.81            | 0.36-21.90    | 0.32           |
|                         |            | C282Y+/-        | 9            | 234426              | 4.61            | 1.89-11.23    | <0.001         |
|                         |            | C282Y +/+       | 0            | 12486               | No observations |               |                |
| Hepatitis B             | Males      | No variants     | 44           | 976749              | 1.00            |               |                |
|                         |            | H63D+/-         | 15           | 380799              | 0.86            | 0.48-1.55     | 0.63           |
|                         |            | H63D+/+         | 0            | 37064               | No observations |               |                |
|                         |            | C282Y+/H63D+    | 3            | 39258               | 1.72            | 0.53-5.56     | 0.36           |
|                         |            | C282Y+/-        | 7            | 195474              | 0.80            | 0.36-1.79     | 0.59           |
|                         |            | C282Y +/+       | 0            | 9090                | No observations |               |                |
| Hepatitis C             | Females    | No variants     | 14           | 1168739             | 1.00            |               |                |
|                         |            | H63D+/-         | 17           | 457631              | 3.14            | 1.55-6.38     | 0.002          |
|                         |            | H63D+/+         | 1            | 44777               | 1.91            | 0.25-14.54    | 0.53           |
|                         |            | C282Y+/H63D+    | 0            | 46122               | No observations |               |                |
|                         |            | C282Y+/-        | 5            | 234390              | 1.77            | 0.64-4.93     | 0.28           |
|                         |            | C282Y +/+       | 1            | 12482               | 6.72            | 0.88-51.50    | 0.07           |
| Hepatitis C             | Males      | No variants     | 53           | 976268              | 1.00            |               |                |
|                         |            | H63D+/-         | 18           | 380699              | 0.87            | 0.51-1.49     | 0.61           |
|                         |            | H63D+/+         | 4            | 37042               | 1.93            | 0.70-5.34     | 0.21           |
|                         |            | C282Y+/H63D+    | 2            | 39225               | 0.95            | 0.23-3.90     | 0.94           |
|                         |            | C282Y+/-        | 11           | 195359              | 1.05            | 0.55-2.02     | 0.88           |
|                         |            | C282Y +/+       | 0            | 9090                | No observations |               |                |

| <b>Incident outcome</b>          | <b>Sex</b> | <b>Genotype</b> | <b>Cases</b> | <b>Person years</b> | <b>HR</b>       | <b>95% CI</b> | <b>p-value</b> |
|----------------------------------|------------|-----------------|--------------|---------------------|-----------------|---------------|----------------|
| Liver cancer                     | Females    | No variants     | 129          | 1033671             | 1.00            |               |                |
|                                  |            | H63D+/-         | 68           | 404702              | 1.36            | 1.01-1.82     | 0.04           |
|                                  |            | H63D+/+         | 4            | 39606               | 0.81            | 0.30-2.20     | 0.69           |
|                                  |            | C282Y+/H63+     | 4            | 40792               | 0.80            | 0.30-2.17     | 0.66           |
|                                  |            | C282Y+/-        | 29           | 207377              | 1.13            | 0.75-1.68     | 0.57           |
|                                  |            | C282Y +/+       | 3            | 11051               | 2.15            | 0.68-6.77     | 0.19           |
| Liver cancer                     | Males      | No variants     | 173          | 865090              | 1.00            |               |                |
|                                  |            | H63D+/-         | 81           | 337334              | 1.20            | 0.92-1.56     | 0.19           |
|                                  |            | H63D+/+         | 7            | 32843               | 1.07            | 0.50-2.27     | 0.87           |
|                                  |            | C282Y+/H63D+    | 10           | 34765               | 1.42            | 0.75-2.68     | 0.28           |
|                                  |            | C282Y+/-        | 37           | 173190              | 1.04            | 0.73-1.48     | 0.84           |
|                                  |            | C282Y +/+       | 9            | 8055                | 5.42            | 2.77-10.63    | <0.001         |
| Hepatocellular carcinoma         | Females    | No variants     | 30           | 1033703             | 1.00            |               |                |
|                                  |            | H63D+/-         | 14           | 404722              | 1.19            | 0.63-2.25     | 0.59           |
|                                  |            | H63D+/+         | 2            | 39606               | 1.70            | 0.41-7.13     | 0.47           |
|                                  |            | C282Y+/H63+     | 0            | 40793               | No observations |               |                |
|                                  |            | C282Y+/-        | 8            | 207390              | 1.33            | 0.61-2.91     | 0.48           |
|                                  |            | C282Y +/+       | 1            | 11051               | 3.10            | 0.42-22.84    | 0.27           |
| Hepatocellular carcinoma         | Males      | No variants     | 80           | 865131              | 1.00            |               |                |
|                                  |            | H63D+/-         | 42           | 337345              | 1.34            | 0.92-1.94     | 0.13           |
|                                  |            | H63D+/+         | 3            | 32849               | 0.99            | 0.31-3.13     | 0.99           |
|                                  |            | C282Y+/H63D+    | 7            | 34765               | 2.14            | 0.99-4.63     | 0.05           |
|                                  |            | C282Y+/-        | 16           | 173194              | 0.96            | 0.56-1.64     | 0.88           |
|                                  |            | C282Y +/+       | 5            | 8059                | 6.38            | 2.57-15.81    | <0.001         |
| Intrahepatic bile duct carcinoma | Females    | No variants     | 69           | 1033666             | 1.00            |               |                |
|                                  |            | H63D+/-         | 39           | 404703              | 1.46            | 0.98-2.16     | 0.06           |
|                                  |            | H63D+/+         | 2            | 39606               | 0.76            | 0.19-3.11     | 0.70           |
|                                  |            | C282Y+/H63+     | 3            | 40792               | 1.11            | 0.35-3.53     | 0.86           |
|                                  |            | C282Y+/-        | 17           | 207380              | 1.23            | 0.72-2.09     | 0.45           |
|                                  |            | C282Y +/+       | 0            | 11053               | No observations |               |                |
| Intrahepatic bile duct carcinoma | Males      | No variants     | 63           | 865128              | 1.00            |               |                |
|                                  |            | H63D+/-         | 28           | 337366              | 1.14            | 0.73-1.77     | 0.57           |
|                                  |            | H63D+/+         | 2            | 32845               | 0.83            | 0.20-3.39     | 0.80           |
|                                  |            | C282Y+/H63D+    | 3            | 34768               | 1.15            | 0.36-3.67     | 0.81           |
|                                  |            | C282Y+/-        | 17           | 173195              | 1.31            | 0.77-2.25     | 0.32           |
|                                  |            | C282Y +/+       | 3            | 8056                | 4.96            | 1.55-15.88    | 0.01           |

146

147

148 Sample excluding prevalent hemochromatosis at baseline (n=450,832), follow-up data from Hospital Episode  
149 Statistics, the Cancer Registry and Death Records.

150 Hazard ratios adjusted for age, assessment center, genotyping array and population genetics sub-structure using  
151 principal components.

152 Excluding individuals with each prevalent diagnosis at baseline only: i.e. the incident liver cancer analysis included  
153 participants with baseline non-cancer liver disease.

154  
155

**Supplement Figures**

156 **Supplementary Figure 1.** Kaplan-Meier failure curve in females for incidence of diagnosed liver cancer by age in  
157 HFE p.C282Y homozygotes compared to those with no variants, in subset with primary care follow-up  
158

159 Incident diagnosis from Hospital Episode Statistics, the Cancer Registry Death Records and primary care data  
160 (n=209,811). Excluding participants with prevalent liver cancer diagnosis at baseline, but including those with non-  
161 cancer liver disease at baseline.

162

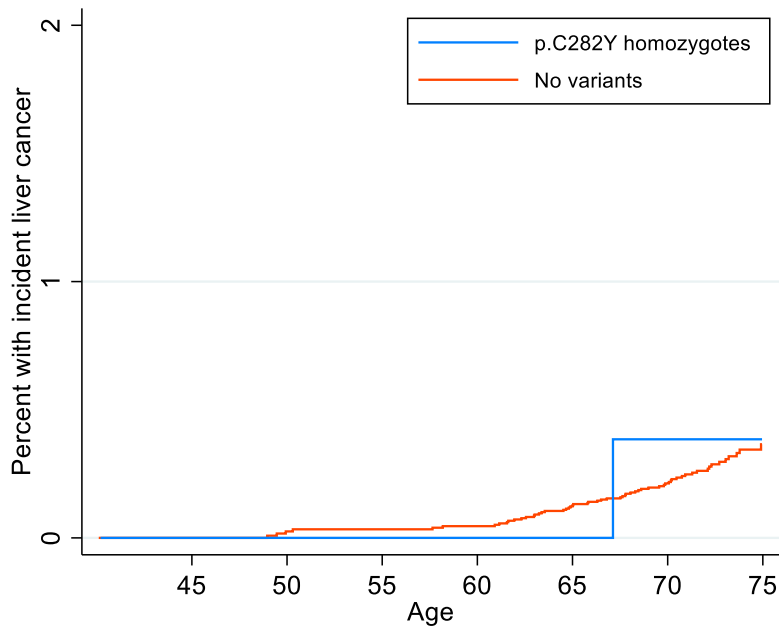

| Number at risk      |                                                           |
|---------------------|-----------------------------------------------------------|
| p.C282Y homozygotes | 78    151    176    180    252    232    55               |
| No variants         | 6424    12095    14688    17460    22432    18162    4694 |

163  
164

165 **Supplementary Figure 2.** Kaplan-Meier failure curves in a) males and b) females for incidence of diagnosed liver  
 166 cancer by age in HFE p.C282Y homozygotes compared to those with no HFE variants  
 167

168 Incident diagnoses from Hospital Episode Statistics, Cancer Registry and Death Records (n=451,186, ignoring  
 169 primary care data from subset). Excluding participants with prevalent liver cancer diagnosis at baseline, but including  
 170 those with non-cancer liver disease at baseline.

171 (a)

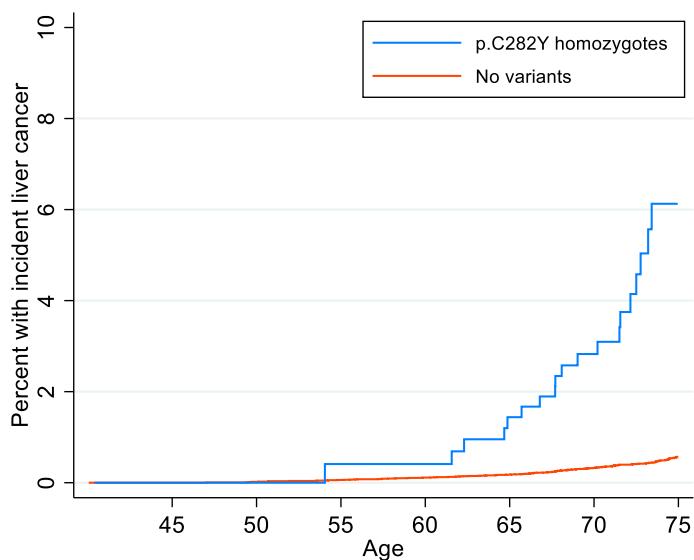

| Number at risk      |  | 45    | 50    | 55    | 60    | 65    | 70    | 75   |
|---------------------|--|-------|-------|-------|-------|-------|-------|------|
| p.C282Y homozygotes |  | 133   | 220   | 245   | 308   | 410   | 375   | 99   |
| No variants         |  | 12019 | 20946 | 24226 | 29524 | 40111 | 36223 | 9461 |

172

173 (b)

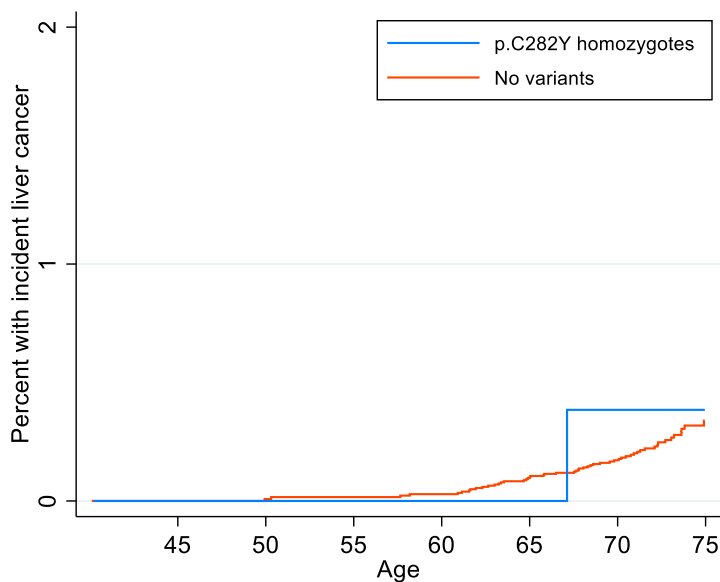

| Number at risk      |  | 45   | 50    | 55    | 60    | 65    | 70    | 75   |
|---------------------|--|------|-------|-------|-------|-------|-------|------|
| p.C282Y homozygotes |  | 78   | 151   | 176   | 180   | 252   | 232   | 55   |
| No variants         |  | 6424 | 12095 | 14688 | 17460 | 22433 | 18163 | 4694 |

174

175 **Supplementary Figure 3.** Kaplan-Meier failure curves in a) males and b) females for incidence of diagnosed liver  
 176 disease by age in HFE p.C282Y homozygotes compared to those with no variants, in subset with primary care follow-  
 177 up  
 178

179 Incident diagnosis from Hospital Episode Statistics, the Cancer Registry and Death Records and primary care data  
 180 (n=209,811). Excluding participants with prevalent non-cancer disease diagnoses at baseline.

181

182 (a)

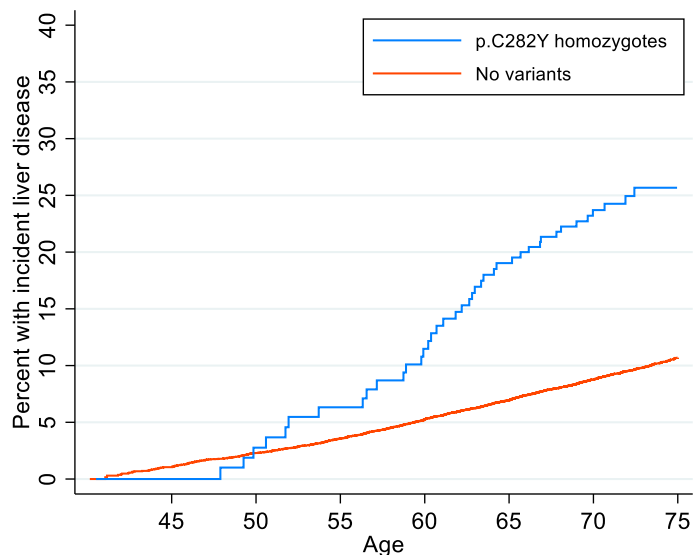

| Number at risk      | 45   | 50    | 55    | 60    | 65    | 70    | 75   |
|---------------------|------|-------|-------|-------|-------|-------|------|
| p.C282Y homozygotes | 66   | 109   | 127   | 141   | 201   | 203   | 66   |
| No variants         | 5485 | 10704 | 12263 | 14856 | 19834 | 18950 | 5881 |

183

184 (b)

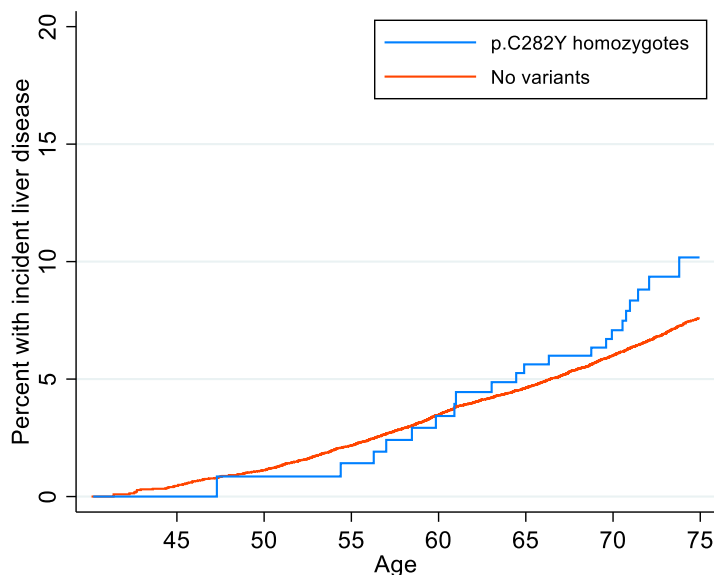

| Number at risk      | 45   | 50    | 55    | 60    | 65    | 70    | 75   |
|---------------------|------|-------|-------|-------|-------|-------|------|
| p.C282Y homozygotes | 78   | 160   | 188   | 192   | 269   | 265   | 85   |
| No variants         | 6399 | 13332 | 16055 | 19190 | 24361 | 21285 | 6455 |

185



186 **Supplementary Figure 4.** Kaplan-Meier failure curves in a) males and b) females for incidence of diagnosed (non-  
 187 cancer) liver disease by age in *HFE* p.C282Y homozygotes compared to those with no variants  
 188

189 Incident diagnosis from Hospital Episode Statistics, the Cancer Registry and Death Records (n=451,186, ignoring  
 190 primary care data from subset). Excluding participants with prevalent non-cancer liver disease diagnoses at baseline.

191 (a)

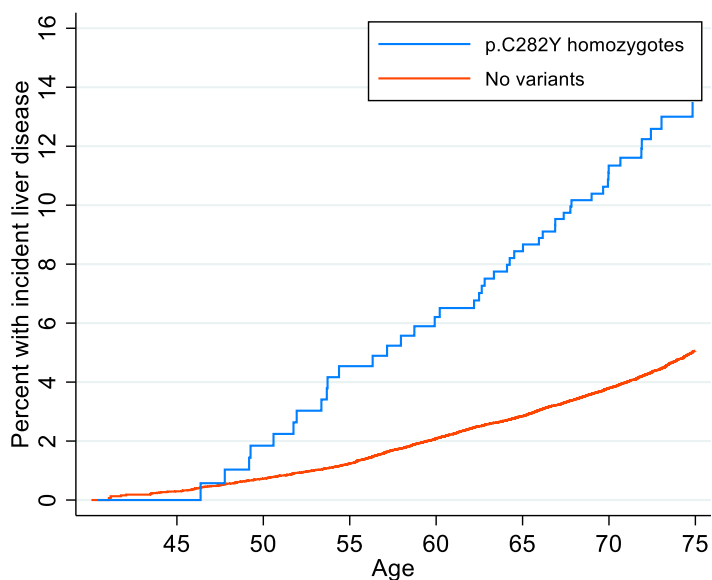

| Number at risk      |  | 45    | 50    | 55    | 60    | 65    | 70    | 75    |
|---------------------|--|-------|-------|-------|-------|-------|-------|-------|
| p.C282Y homozygotes |  | 131   | 249   | 274   | 317   | 432   | 416   | 131   |
| No variants         |  | 11979 | 23345 | 26765 | 32413 | 43706 | 42171 | 13471 |

192

193 (b)

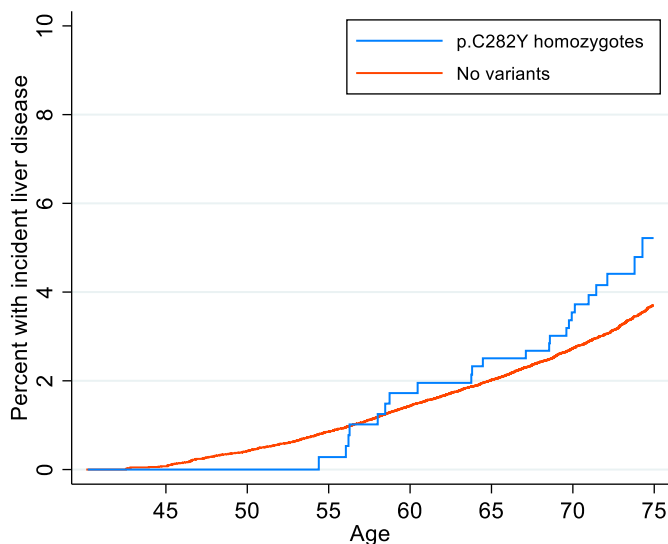

| Number at risk      |  | 45    | 50    | 55    | 60    | 65    | 70    | 75    |
|---------------------|--|-------|-------|-------|-------|-------|-------|-------|
| p.C282Y homozygotes |  | 153   | 306   | 372   | 437   | 580   | 554   | 177   |
| No variants         |  | 13776 | 28622 | 34294 | 41282 | 52859 | 46710 | 14472 |

194
